# Supplementary material
Source: Springer Nature journal article supplement (https://www.springermedizin.de/resource/supplementary/13075_2009_2767_MOESM3_ESM.pdf/9692836)

**(a)**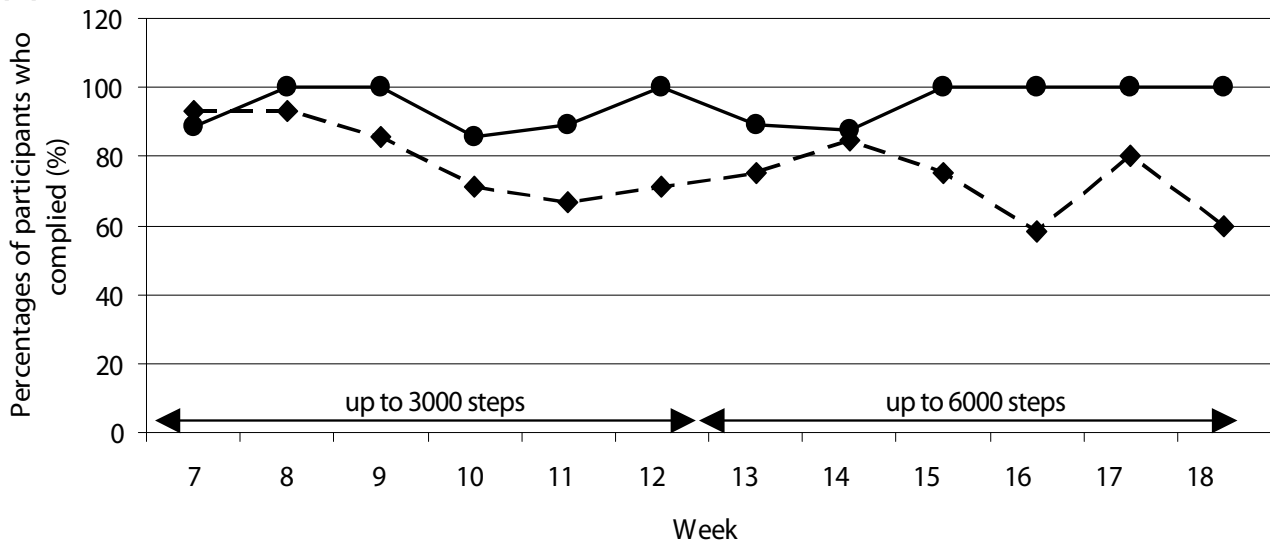**(b)**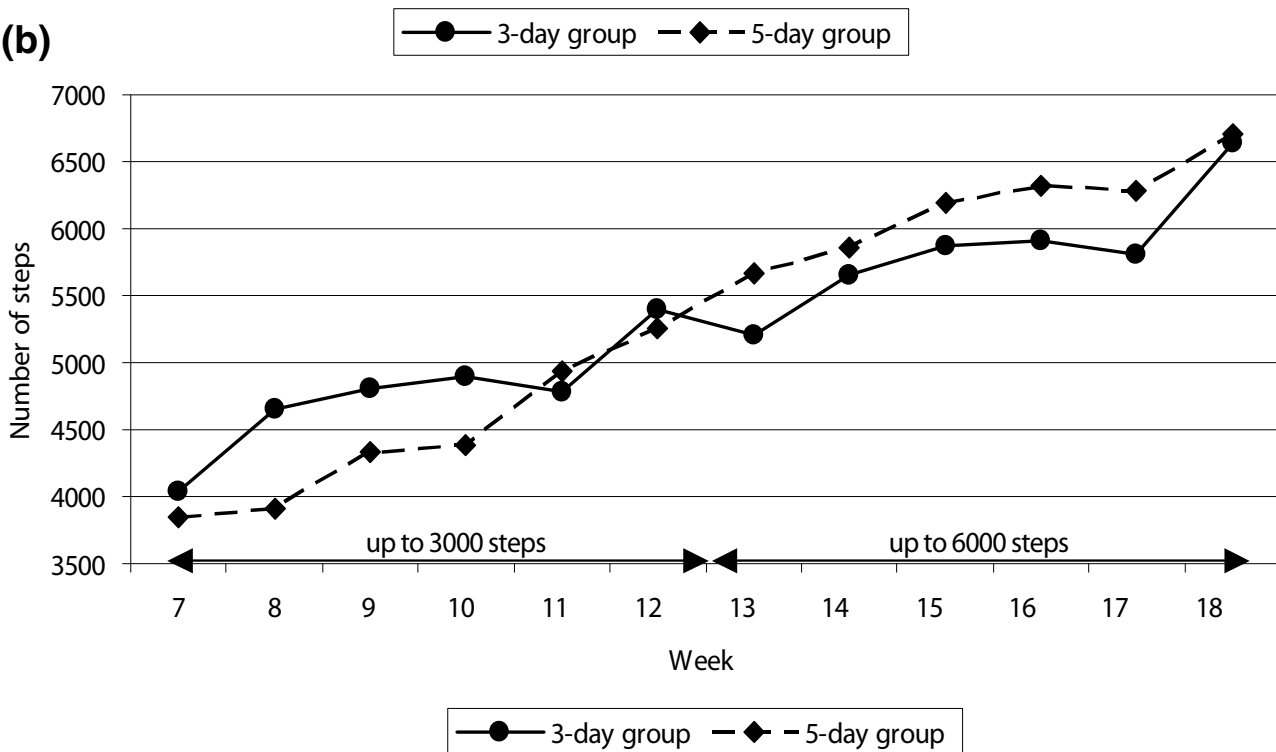

Supplement: MOESM3 [file 9692836]
